# Supplementary material for: GYY4137 and Sodium Hydrogen Sulfide Relaxations Are Inhibited by L-Cysteine and KV7 Channel Blockers in Rat Small Mesenteric Arteries
Source: PubMed Central journal article supplement (PMC8032876; doi:10.3389/fphar.2021.613989), 2021-03-26

## GY4137 and sodium hydrogen sulfide relaxations are inhibited by L-cysteine and Kv7 channel blockers in rat small mesenteric arteries

Silvijus Abramavicius<sup>1,2</sup>, Asbjørn G. Petersen<sup>1</sup>, Nirthika S. Renaltan<sup>1</sup>, Judit Prat-Duran<sup>1</sup>, Roberta Torregrossa<sup>3</sup>, Edgaras Stankevicius<sup>2</sup>, Matthew Whiteman<sup>3</sup>, Ulf Simonsen<sup>1\*</sup>

**Supplementary Figure for review.** <sup>1</sup>H-, <sup>31</sup>P-NMR spectra five hours after mixing GY4137 mixed with five equivalents of L-cysteine in water. The blue arrows show the formation of a new product. The results are preliminary and number of other approaches will be required to identify the product that is formed.

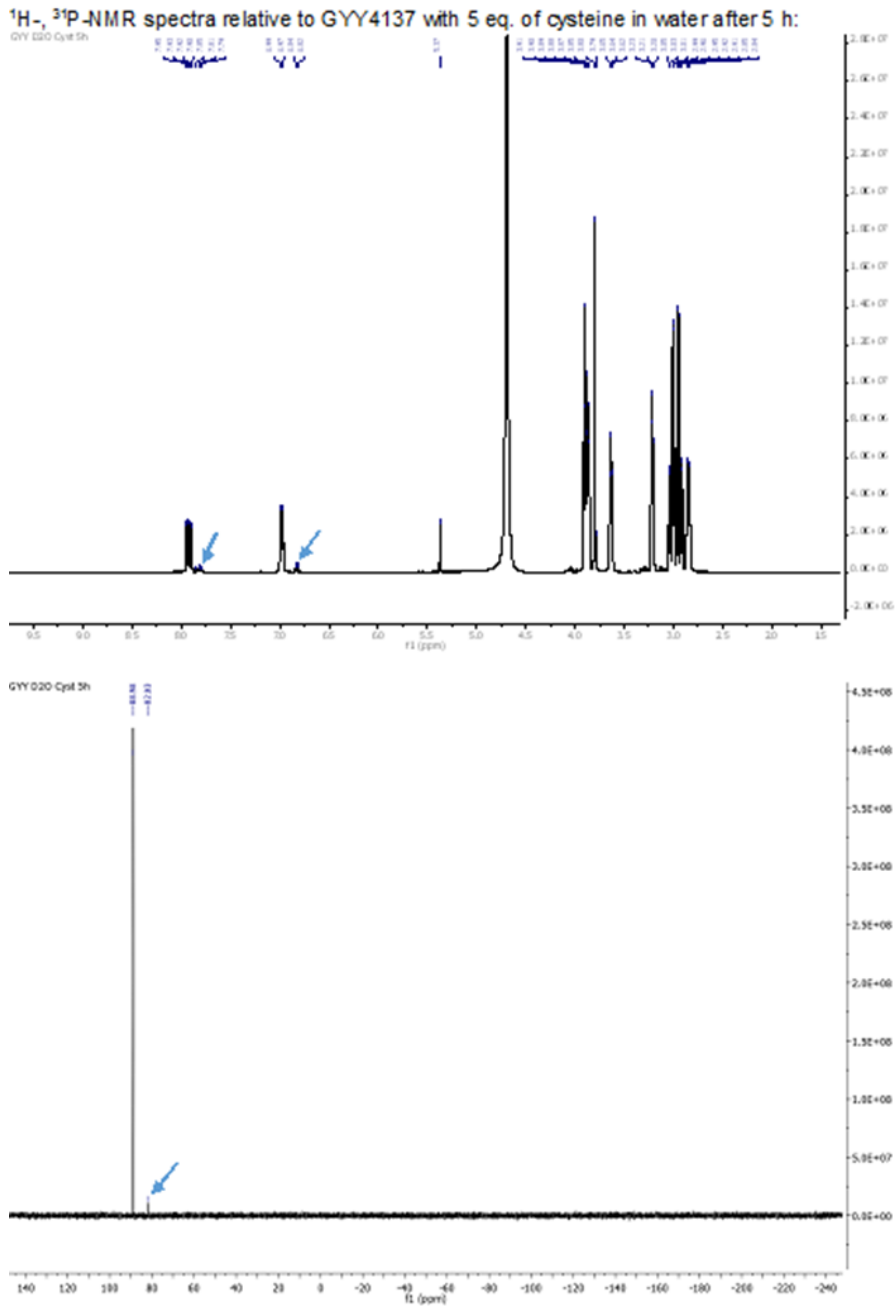

Supplement: datasheet1.pdf [file datasheet1.pdf]
