# Supplementary material for: GYY4137 and Sodium Hydrogen Sulfide Relaxations Are Inhibited by L-Cysteine and KV7 Channel Blockers in Rat Small Mesenteric Arteries
Source: PubMed Central journal article supplement (PMC8032876; doi:10.3389/fphar.2021.613989), 2021-03-26
Supplement: datasheet2.pdf [file datasheet2.pdf]

## Supplementary Material

### GY4137 and sodium hydrogen sulfide relaxations are inhibited by L-cysteine and Kv7 channel blockers in rat small mesenteric arteries

Silvijus Abramavicius<sup>1,2</sup>, Asbjørn G. Petersen<sup>1</sup>, Nirthika S. Renaltan<sup>1</sup>, Judit Prat-Duran<sup>1</sup>, Roberta Torregrossa<sup>3</sup>, Edgaras Stankevicius<sup>2</sup>, Matthew Whiteman<sup>3</sup>, Ulf Simonsen<sup>1\*</sup>

<sup>1</sup>Department of Biomedicine, Pulmonary and Cardiovascular Pharmacology, Aarhus University, Aarhus, Denmark

<sup>2</sup>Institute of Physiology and Pharmacology, Lithuanian University of Health Sciences, Kaunas, Lithuania

<sup>3</sup>University of Exeter Medical School, St. Luke's Campus, Exeter, United Kingdom

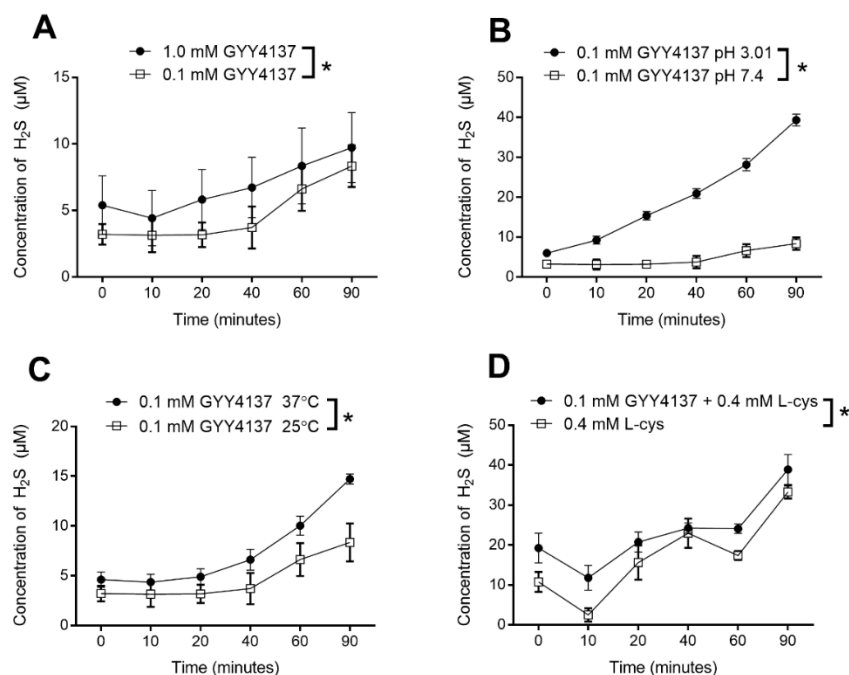

**Supplementary Figure S1. Release of sulfides from GYY4137 under different conditions.** A) Effect of GYY4137 concentration. B) Effect of pH. C) Effect of temperature. D) Effect of L-Cysteine on release of sulfides. The increase in sulfides caused by L-cysteine were subtracted and the figure only show the increase induced after addition of GYY4137. Where no error bars are indicated, error lies within dimensions of symbol. \* $P < 0.05$ , two-way ANOVA. All data are represented as means  $\pm$  SEM (n = 6).
